# Supplementary material
Source: PubMed Central journal article supplement (PMC7340696)
Supplement: 12264_2020_469_MOESM1_ESM.pdf [file 12264_2020_469_MOESM1_ESM.pdf]

## Supplementary Information

**Table S1. Detailed data for the selection and exclusion of SNPs**

| SNPs       | Neighboring gene | Referenced studies | Reported OR | MAF in China | Ref (validation in China) |
|------------|------------------|--------------------|-------------|--------------|---------------------------|
| rs78117248 | ABCA7            | 1                  | 2.07        | 0            |                           |
| rs4147929  | ABCA7            | 1, 2               | 1.15        | 0.2816       |                           |
| rs3764650  | ABCA7            | 3                  | 1.23        | 0.267        |                           |
| rs3752246  | ABCA7            | 4                  | 1.15        | 0.2767       |                           |
| rs7412     | APOE             | 1                  | ~2 to 5     | 0.1068       |                           |
| rs429358   | APOE             | 1                  | ~2 to 5     | 0.1019       |                           |
| rs2588969  | ARID5B           | 4                  | 0.99/0.93   | 0.4757       |                           |
| rs59335482 | BIN1             | 1                  | 1.2         | NA           |                           |
| rs7561528  | BIN1             | 4, 3,              | 1.17/1.16   | 0.1214       |                           |
| rs6733839  | BIN1             | 1, 2               | 1.22        | 0.4223       |                           |
| rs744373   | BIN1             | 3, 5               | 1.17        | 0.3301       |                           |
| rs7274581  | CASS4            | 1, 2               | 0.88/1.14   | 0            |                           |
| rs9349407  | CD2AP            | 4, 3               | 1.11/1.12   | 0.1262       |                           |
| rs9296559  | CD2AP            | 3                  | 1.1         | 0.1262       |                           |
| rs10948363 | CD2AP            | 1, 2, 3            | 1.1         | 0.1262       |                           |
| rs3865444  | CD33             | 1, 2, 4, 3         | 0.91/0.89   | 0.1796       |                           |
| rs3826656  | CD33             | 4                  | 0.316       | 0.3155       |                           |
| rs1532278  | CLU              | 1, 4               | 0.89/1.20   | 0.1942       |                           |
| rs11136000 | CLU              | 3, 5               | 0.84        | 0.199        |                           |
| rs7982     | CLU              | 3                  | NA          | 0.1893       |                           |
| rs9331888  | CLU              | 3                  | NA          | 0.4757       |                           |
| rs9331896  | CLU              | 1, 2               | 1.16        | 0.1893       |                           |
| rs2279590  | CLU              | 3                  | NA          | 0.211        | 6,7                       |
| rs6656401  | CR1              | 1, 3,8             | 1.18        | 0.0388       |                           |
| rs6701713  | CR1              | 4,5                | 1.16        | 0.335        |                           |
| rs8093731  | DSG2             | 2                  | 0.91        | 0.0194       |                           |
| rs11771145 | EPHA1            | 1, 2, 3            | 1.11        | 0.4369       |                           |
| rs11767557 | EPHA1            | 4, 3               | 0.9/0.87    | 0.1408       | 9                         |
| rs597668   | EXOC3L2          | 8                  | 0.88/0.97   | 0.33         |                           |
| rs17125944 | FERMT2           | 1, 2               | 1.14        | 0.2524       |                           |
| rs9271192  | HLA-DRA/HLA-DRB5 | 1, 2               | 1.11        | 0.1796       |                           |
| rs35349669 | INPP5D           | 1, 2               | 1.08        | 0.0194       |                           |
| rs190982   | MEF2C            | 1, 2               | 0.93/1.08   | 0.1553       | 9                         |
| rs983392   | MS4A             | 1,2, 3             | 1.11        | 0.0485       |                           |
| rs670139   | MS4A             | 3                  | 1.08        | 0.4175       |                           |
| rs4938933  | MS4A             | 4                  | 0.88        | 0.2621       |                           |
| rs2718058  | NME8             | 1, 2               | 0.93/1.08   | 0.2573       | 9,10                      |

|            |         |         |           |        |      |
|------------|---------|---------|-----------|--------|------|
| rs3851179  | PICALM  | 3, 5    | 0.85      | 0.4563 |      |
| rs10792832 | PICALM  | 1, 2    | 1.15      | 0.4612 |      |
| rs561655   | PICALM  | 4       | 0.87      | 0.4854 |      |
| rs541458   | PICALM  | 3       | /         | 0.456  |      |
| rs28834970 | PTK2B   | 1, 2    | 1.1       | 0.2282 |      |
| rs10498633 | SCL24A4 | 1, 2    | 0.91/1.10 | 0.217  | 9,11 |
| rs11218343 | SORL1   | 1, 2, 3 | 0.77/1.30 | 0.3107 |      |
| rs3781834  | SORL1   | 8       | 0.78      | 0.262  |      |
| rs2075650  | TOMM40  | 5       | 2.53      | 0.1117 |      |
| rs75932628 | TREM2   | 1, 3    | 2.26      | 0      |      |
| rs1476679  | ZCWPW1  | 1, 2    | 0.91/1.10 | 0.3252 |      |

MAF, minor allele frequency; MAF in CHB data set was from the 1000 Genomes database (<http://asia.ensembl.org/>); Ref (validation in China) means studies validating that the SNPs have no association with sAD in Chinese

**Table S2. Detailed information on 35 SNPs in 18 genes**

| SNP        | Neighbor Gene | Chr | Minor Allele | MAF (%) | HWE ( <i>P</i> value) | Position  |
|------------|---------------|-----|--------------|---------|-----------------------|-----------|
| rs3752246  | ABCA7         | 19  | G            | 0.28    | 0.17                  | 1056492   |
| rs3764650  | ABCA7         | 19  | G            | 0.27    | 0.18                  | 1046520   |
| rs4147929  | ABCA7         | 19  | A            | 0.28    | 0.58                  | 1063443   |
| rs429358   | APOE4         | 19  | C            | 0.10    | 0.82                  | 45411941  |
| rs7412     | APOE4         | 19  | T            | 0.11    | 0.08                  | 45412079  |
| rs2588969  | ARID5B        | 10  | C            | 0.48    | 0.64                  | 63611354  |
| rs7561528  | BIN1          | 2   | A            | 0.12    | 0.29                  | 127889637 |
| rs6733839  | BIN1          | 2   | T            | 0.42    | 0.62                  | 127892810 |
| rs744373   | BIN1          | 2   | G            | 0.33    | 0.47                  | 127894615 |
| rs10948363 | CD2AP         | 6   | G            | 0.13    | 0.27                  | 47487762  |
| rs9296559  | CD2AP         | 6   | C            | 0.13    | 0.50                  | 47452270  |
| rs9349407  | CD2AP         | 6   | C            | 0.13    | 0.52                  | 47453378  |
| rs3826656  | CD33          | 19  | A            | 0.32    | 0.76                  | 51726613  |
| rs3865444  | CD33          | 19  | A            | 0.18    | 0.28                  | 51727962  |
| rs11136000 | CLU           | 8   | T            | 0.20    | 0.66                  | 27464519  |
| rs1532278  | CLU           | 8   | T            | 0.19    | 0.66                  | 27466315  |
| rs7982     | CLU           | 8   | A            | 0.19    | 0.30                  | 27462481  |
| rs9331888  | CLU           | 8   | G            | 0.48    | 0.03                  | 27468862  |
| rs9331896  | CLU           | 8   | C            | 0.19    | 0.77                  | 27467686  |
| rs6701713  | CR1           | 1   | A            | 0.34    | 1                     | 207786289 |
| rs11771145 | EPHA1         | 7   | G            | 0.44    | 0.92                  | 143110762 |
| rs597668   | EXOC3L2       | 19  | C            | 0.33    | 0.03                  | 45708888  |
| rs17125944 | FERMT2        | 14  | C            | 0.25    | 0.26                  | 53400629  |
| rs9271192  | HLA-DRA       | 6   | C            | 0.18    | 0.44                  | 32578530  |
| rs4938933  | MS4A          | 11  | C            | 0.26    | 0.35                  | 60034429  |

|            |        |    |   |      |      |           |
|------------|--------|----|---|------|------|-----------|
| rs670139   | MS4A   | 11 | T | 0.42 | 0.34 | 59971795  |
| rs10792832 | PICALM | 11 | A | 0.46 | 0.56 | 85867875  |
| rs3851179  | PICALM | 11 | T | 0.46 | 0.38 | 85868640  |
| rs541458   | PICALM | 11 | T | 0.46 | 0.64 | 85788351  |
| rs561655   | PICALM | 11 | G | 0.49 | 0.85 | 85800279  |
| rs28834970 | PTK2B  | 8  | C | 0.23 | 0.48 | 27195121  |
| rs11218343 | SORL1  | 11 | C | 0.31 | 0.58 | 121435587 |
| rs3781834  | SORL1  | 11 | G | 0.26 | 0.19 | 121445940 |
| rs2075650  | TOMM40 | 19 | G | 0.11 | 0.35 | 45395619  |
| rs1476679  | ZCWPW1 | 7  | C | 0.33 | 0.26 | 100004446 |

---

SNP, single-nucleotide polymorphism; Chr, chromosome; MAF, minor allele frequency; HWE, Hardy-Weinberg equilibrium; MAF in CHB data set was from the 1000 Genomes database (<http://asia.ensembl.org/>) ; HWE test was performed in the control group.

**Table S3. Allele distribution of SNPs in our study groups**

| SNP        | Neighboring Gene | Risk allele | Risk allele frequency |         | OR (95% CI)     | <i>P</i> value |
|------------|------------------|-------------|-----------------------|---------|-----------------|----------------|
|            |                  |             | sAD                   | Control |                 |                |
| rs4147929  | ABCA7            | A           | 0.33                  | 0.30    | 1.13(0.93-1.38) | 0.23           |
| rs3764650  | ABCA7            | G           | 0.32                  | 0.30    | 1.11(0.91-1.36) | 0.31           |
| rs3752246  | ABCA7            | G           | 0.34                  | 0.32    | 1.08(0.89-1.31) | 0.45           |
| rs429358   | APOE4            | C           | 0.25                  | 0.12    | 2.55(1.99-3.28) | 0.00           |
| rs7412     | APOE4            | T           | 0.05                  | 0.07    | 0.62(0.42-0.92) | 0.02           |
| rs2588969  | ARID5B           | C           | 0.49                  | 0.48    | 1.02(0.85-1.23) | 0.85           |
| rs6733839  | BIN1             | T           | 0.45                  | 0.38    | 1.30(1.08-1.57) | 0.01           |
| rs7561528  | BIN1             | A           | 0.13                  | 0.10    | 1.38(1.03-1.85) | 0.03           |
| rs744373   | BIN1             | G           | 0.36                  | 0.34    | 1.07(0.88-1.30) | 0.49           |
| rs9296559  | CD2AP            | C           | 0.13                  | 0.12    | 1.15(0.87-1.52) | 0.32           |
| rs10948363 | CD2AP            | G           | 0.13                  | 0.12    | 1.14(0.87-1.51) | 0.36           |
| rs9349407  | CD2AP            | C           | 0.13                  | 0.12    | 1.13(0.86-1.49) | 0.40           |
| rs3865444  | CD33             | A           | 0.17                  | 0.22    | 0.72(0.57-0.91) | 0.01           |
| rs3826656  | CD33             | A           | 0.30                  | 0.34    | 0.81(0.66-0.98) | 0.03           |
| rs1532278  | CLU              | T           | 0.18                  | 0.20    | 0.90(0.71-1.13) | 0.37           |
| rs9331896  | CLU              | C           | 0.19                  | 0.20    | 0.90(0.71-1.13) | 0.37           |
| rs11136000 | CLU              | T           | 0.19                  | 0.20    | 0.92(0.73-1.16) | 0.51           |
| rs9331888  | CLU              | G           | 0.50                  | 0.49    | 1.07(0.88-1.29) | 0.53           |
| rs7982     | CLU              | A           | 0.18                  | 0.19    | 0.93(0.74-1.18) | 0.59           |
| rs6701713  | CR1              | A           | 0.35                  | 0.36    | 0.95(0.78-1.15) | 0.59           |
| rs11771145 | EPHA1            | G           | 0.48                  | 0.43    | 1.25(1.04-1.50) | 0.02           |
| rs597668   | EXOC3L2          | C           | 0.35                  | 0.35    | 1.03(0.85-1.25) | 0.77           |
| rs17125944 | FERMT2           | C           | 0.23                  | 0.21    | 1.10(0.88-1.38) | 0.43           |
| rs9271192  | HLA-DRA          | C           | 0.21                  | 0.19    | 1.13(0.90-1.43) | 0.31           |

|            |        |   |      |      |                 |      |
|------------|--------|---|------|------|-----------------|------|
| rs4938933  | MS4A   | C | 0.30 | 0.27 | 1.11(0.90-1.36) | 0.32 |
| rs670139   | MS4A   | T | 0.42 | 0.44 | 0.95(0.79-1.14) | 0.57 |
| rs561655   | PICALM | G | 0.43 | 0.49 | 0.78(0.65-0.94) | 0.01 |
| rs541458   | PICALM | T | 0.47 | 0.53 | 0.79(0.65-0.95) | 0.01 |
| rs10792832 | PICALM | A | 0.35 | 0.40 | 0.81(0.67-0.98) | 0.03 |
| rs3851179  | PICALM | T | 0.35 | 0.39 | 0.81(0.67-0.99) | 0.04 |
| rs28834970 | PTK2B  | C | 0.26 | 0.27 | 0.92(0.74-1.13) | 0.42 |
| rs11218343 | SORL1  | C | 0.26 | 0.31 | 0.78(0.64-0.96) | 0.02 |
| rs3781834  | SORL1  | G | 0.19 | 0.23 | 0.79(0.63-0.99) | 0.04 |
| rs2075650  | TOMM40 | G | 0.23 | 0.11 | 2.32(1.79-3.00) | 0.00 |
| rs1476679  | ZCWPW1 | C | 0.32 | 0.29 | 1.14(0.93-1.40) | 0.20 |

---

SNP, single nucleotide polymorphism; sAD, sporadic Alzheimer's disease; OR, odds ratio; CI, confidence interval; OR and 95% CI adjusted for age, sex, and APOE ε4 status

**Table S4. Genotype frequencies of 35 SNPs in our study groups**

| SNP            | Neighboring Gene | Genotype | Number of Samples |            | P value      | OR (95% CI)     |
|----------------|------------------|----------|-------------------|------------|--------------|-----------------|
|                |                  |          | sAD               | Control    |              |                 |
| rs4147929      | ABCA7            | GG/GC/CC | 57/199/203        | 54/188/218 | 0.3797       | 1.14(0.93-1.40) |
| rs3764650      | ABCA7            | GG/GT/TT | 48/196/217        | 46/180/237 | 0.3236       | 1.11(0.90-1.35) |
| rs3752246      | ABCA7            | AA/AG/GG | 52/202/207        | 45/190/228 | 0.1927       | 1.09(0.90-1.33) |
| rs429358       | APOE             | CC/CT/TT | 42/149/268        | 7/94/358   | 0.0015<br>22 | 3.94(1.69-9.18) |
| rs7412         | APOE             | TT/TC/CC | 3/37/419          | 5/57/395   | 0.0713<br>8  | 0.69(0.47-1.03) |
| rs2588969      | ARID5B           | AA/AG/GG | 55/203/203        | 51/199/213 | 0.5271       | 1.04(0.86-1.25) |
| rs6733839      | BIN1             | AA/AG/GG | 7/106/348         | 2/87/374   | 0.0717<br>8  | 1.28(1.05-1.55) |
| rs7561528      | BIN1             | TT/TC/CC | 91/233/137        | 71/214/177 | 0.0137<br>3  | 1.33(0.98-1.80) |
| rs744373       | BIN1             | GG/GA/AA | 54/211/182        | 57/198/201 | 0.463        | 1.08(0.88-1.32) |
| rs9296559      | CD2AP            | GG/GA/AA | 5/113/343         | 9/93/361   | 0.5241       | 1.11(0.83-1.48) |
| rs1094836<br>3 | CD2AP            | CC/CT/TT | 5/113/343         | 8/94/361   | 0.4751       | 1.10(0.82-1.46) |
| rs9349407      | CD2AP            | CC/CG/GG | 5/113/343         | 8/96/359   | 0.583        | 1.08(0.81-1.45) |
| rs3865444      | CD33             | AA/AG/GG | 35/200/226        | 56/206/201 | 0.0043<br>65 | 0.66(0.51-0.85) |
| rs3826656      | CD33             | AA/AC/CC | 12/129/320        | 18/168/277 | 0.0011<br>73 | 0.74(0.60-0.91) |
| rs1532278      | CLU              | TT/TC/CC | 14/146/300        | 20/145/295 | 0.6193       | 0.92(0.72-1.17) |
| rs9331896      | CLU              | TT/TC/CC | 12/144/300        | 20/145/294 | 0.4858       | 0.91(0.72-1.16) |
| rs1113600<br>0 | CLU              | AA/AG/GG | 13/143/305        | 21/138/304 | 0.737        | 0.94(0.74-1.20) |

|                |         |          |                 |                 |              |                 |
|----------------|---------|----------|-----------------|-----------------|--------------|-----------------|
| rs9331888      | CLU     | GG/GC/CC | 125/195/12<br>2 | 116/200/13<br>0 | 0.5919       | 1.05(0.88-1.26) |
| rs7982         | CLU     | CC/CT/TT | 12/147/302      | 20/147/296      | 0.4689       | 0.96(0.75-1.22) |
| rs6701713      | CR1     | GG/GA/AA | 31/192/238      | 34/194/235      | 0.8289       | 0.92(0.75-1.13) |
| rs1177114<br>5 | EPHA1   | GG/GA/AA | 102/242/11<br>7 | 86/226/151      | 0.0432<br>3  | 1.22(1.01-1.49) |
| rs597668       | EXOC3L2 | CC/CT/TT | 59/212/190      | 66/188/209      | 0.8591       | 1.02(0.84-1.24) |
| rs1712594<br>4 | FERMT2  | CC/CT/TT | 33/143/282      | 24/145/293      | 0.536        | 1.07(0.86-1.34) |
| rs9271192      | HLA-DRA | CC/CA/AA | 26/138/297      | 13/146/304      | 0.7274       | 1.04(0.82-1.32) |
| rs4938933      | MS4A    | CC/CA/AA | 52/191/211      | 43/200/216      | 0.3601       | 1.12(0.91-1.38) |
| rs670139       | MS4A    | TT/TG/GG | 65/255/139      | 81/237/142      | 0.6013       | 0.95(0.77-1.16) |
| rs561655       | PICALM  | AA/AG/GG | 64/196/201      | 70/228/162      | 0.0152<br>4  | 0.75(0.62-0.91) |
| rs541458       | PICALM  | TT/TC/CC | 62/197/202      | 67/231/165      | 0.0185<br>3  | 0.77(0.64-0.92) |
| rs1079283<br>2 | PICALM  | CC/CT/TT | 108/215/13<br>8 | 131/226/10<br>6 | 0.0054<br>82 | 0.78(0.64-0.95) |
| rs3851179      | PICALM  | GG/GA/AA | 90/217/154      | 113/229/12<br>1 | 0.0032<br>73 | 0.79(0.65-0.96) |
| rs2883497<br>0 | PTK2B   | CC/CT/TT | 35/161/256      | 37/175/245      | 0.4243       | 0.92(0.74-1.13) |
| rs1121834<br>3 | SORL1   | CC/CT/TT | 18/197/246      | 40/202/221      | 0.0912<br>4  | 0.83(0.66-1.03) |
| rs3781834      | SORL1   | GG/GA/AA | 9/153/299       | 29/153/281      | 0.0599<br>8  | 0.80(0.63-1.01) |
| rs2075650      | TOMM40  | GG/GA/AA | 33/144/281      | 8/89/362        | 0.0829<br>1  | 1.57(0.94-2.61) |
| rs1476679      | ZCWPW1  | CC/CT/TT | 46/203/212      | 34/202/227      | 0.282        | 1.12(0.91-1.38) |

---



SNP, single nucleotide polymorphism; sAD, sporadic Alzheimer's disease; OR, odds ratio; CI, confidence interval; OR and 95% CI adjusted for age, sex, and APOE  $\epsilon$ 4 status

**Table S5 Correlations between PRSs and CSF biomarkers**

| Biomarkers                     | sAD      |                | Cognitively Normal Participants |                |
|--------------------------------|----------|----------------|---------------------------------|----------------|
|                                | (n = 60) |                | (n = 200)                       |                |
|                                | $\rho$   | <i>P</i> value | $\rho$                          | <i>P</i> value |
| CSF A $\beta$ 42               | 0.15     | 0.28           | -0.15                           | 0.043          |
| CSF A $\beta$ 42/ A $\beta$ 40 | 0.08     | 0.54           | -0.18                           | 0.011          |
| CSF T-tau                      | -0.10    | 0.44           | 0.08                            | 0.28           |
| CSF P-tau                      | -0.06    | 0.67           | 0.08                            | 0.27           |

sAD, sporadic Alzheimer's disease; CSF, cerebrospinal fluid. Spearman correlation coefficients ( $\rho$ ) were used to assess the correlations.

## References

1. Cuyvers E, Sleegers K. Genetic variations underlying Alzheimer's disease: evidence from genome-wide association studies and beyond. *The Lancet Neurology*. 2016;15(8):857-868.
2. Lambert J-C, Ibrahim-Verbaas CA, Harold D, et al. Meta-analysis of 74,046 individuals identifies 11 new susceptibility loci for Alzheimer's disease. *Nature Genetics*. 2013;45(12):1452-1458.
3. Karch CM, Goate AM. Alzheimer's Disease Risk Genes and Mechanisms of Disease Pathogenesis. *Biological Psychiatry*. 2015;77(1):43-51.
4. Naj AC, Jun G, Beecham GW, et al. Common variants at MS4A4/MS4A6E, CD2AP, CD33 and EPHA1 are associated with late-onset Alzheimer's disease. *Nat Genet*. May 2011;43(5):436-441.
5. Harold D, Abraham R, Hollingworth P, et al. Genome-wide association study identifies variants at CLU and PICALM associated with Alzheimer's disease. *Nat Genet*. Oct 2009;41(10):1088-1093.
6. Zhang S, Li X, Ma G, et al. CLU rs9331888 Polymorphism Contributes to Alzheimer's Disease Susceptibility in Caucasian But Not East Asian Populations. *Mol Neurobiol*. Apr 2016;53(3):1446-1451.
7. Yu JT, Li L, Zhu QX, et al. Implication of CLU gene polymorphisms in Chinese patients with Alzheimer's disease. *Clinica chimica acta; international journal of clinical chemistry*. Oct 09 2010;411(19-20):1516-1519.
8. Toft M, Miyashita A, Koike A, et al. SORL1 Is Genetically Associated with Late-Onset Alzheimer's Disease in Japanese, Koreans and Caucasians. *PLoS ONE*. 2013;8(4).
9. Xiao Q, Liu ZJ, Tao S, et al. Risk prediction for sporadic Alzheimer's disease using genetic risk score in the Han Chinese population. *Oncotarget*. Nov 10 2015;6(35):36955-36964.
10. Liu Y, Yu JT, Wang HF, et al. Association between NME8 locus polymorphism and cognitive decline, cerebrospinal fluid and neuroimaging biomarkers in Alzheimer's disease. *PLoS One*. 2014;9(12):e114777.
11. Lu H, Zhu XC, Wang HF, et al. Lack of Association Between SLC24A4 Polymorphism and Late-onset Alzheimer's Disease in Han Chinese. *Curr Neurovasc Res*. 2016;13(3):239-243.
